# Supplementary material
Source: ML conference proceedings conference paper supplement (https://proceedings.mlr.press/v70/hazan17a.html)
Supplement: Supplementary file [file hazan17a-supp.pdf]

---

# Supplementary Material for “Efficient Regret Minimization in Non-Convex Games”

---

Elad Hazan<sup>1</sup> Karan Singh<sup>1</sup> Cyril Zhang<sup>1</sup>

## A. Proof of Theorem 4.4

Since each  $f_t$  is  $\beta$ -smooth, it follows that each  $F_t$  is  $\beta$ -smooth. Define  $\widehat{\nabla f}_t = \frac{x_t - x_{t+1}}{\eta}$ . Note that since the iterates ( $x_t : t \in [T]$ ) depend on the gradient estimates, the iterates are stochastic variables, as are  $\widehat{\nabla f}_t$ . By  $\beta$ -smoothness of  $F_t$ , we have

$$\begin{aligned}
& F_{t,w}(x_{t+1}) - F_{t,w}(x_t) \\
& \leq \langle \nabla F_{t,w}(x_t), x_{t+1} - x_t \rangle + \frac{\beta}{2} \|x_{t+1} - x_t\|^2 \\
& = -\eta \langle \nabla F_{t,w}(x_t), \widehat{\nabla f}_t \rangle + \eta^2 \frac{\beta}{2} \|\widehat{\nabla f}_t\|^2 \\
& = -\eta \|\nabla F_{t,w}(x_t)\|^2 - \eta \langle \nabla F_{t,w}(x_t), \widehat{\nabla f}_t - \nabla F_{t,w}(x_t) \rangle \\
& \quad + \eta^2 \frac{\beta}{2} (\|\nabla F_{t,w}(x_t)\|^2) \\
& \quad + \eta^2 \frac{\beta}{2} \left( 2 \langle \nabla F_{t,w}(x_t), \widehat{\nabla f}_t - \nabla F_{t,w}(x_t) \rangle \right) \\
& \quad + \eta^2 \frac{\beta}{2} \left( \|\widehat{\nabla f}_t - \nabla F_{t,w}(x_t)\|^2 \right) \\
& = -\left( \eta - \frac{\beta}{2} \eta^2 \right) \|\nabla F_{t,w}(x_t)\|^2 \\
& \quad - (\eta - \beta \eta^2) \langle \nabla F_{t,w}(x_t), \widehat{\nabla f}_t - \nabla F_{t,w}(x_t) \rangle \\
& \quad + \eta^2 \frac{\beta}{2} \|\widehat{\nabla f}_t - \nabla f(x_t)\|^2.
\end{aligned}$$

Additionally, we each observe that  $\widehat{\nabla f}_t$  is an average of  $w$  independently sampled unbiased gradient estimates of variance  $\sigma^2$  each. It follows as a consequence that

$$\begin{aligned}
\mathbb{E}[\widehat{\nabla f}_t | x_t] &= \nabla F_{t,w}(x_t) \\
\mathbb{E}[\|\widehat{\nabla f}_t - \nabla F_{t,w}(x_t)\|^2 | x_t] &\leq \frac{\sigma^2}{w}
\end{aligned}$$

---

<sup>1</sup>Computer Science, Princeton University. Correspondence to: Elad Hazan <ehazan@princeton.edu>, Karan Singh <karans@princeton.edu>, Cyril Zhang <cyril.zhang@princeton.edu>.

Now, applying  $\mathbb{E}[\cdot | x_t]$  on both sides, it follows that

$$\begin{aligned}
& \left( \eta - \frac{\beta}{2} \eta^2 \right) \cdot \mathbb{E} \|\nabla F_{t,w}(x_t)\|^2 \\
& \leq \mathbb{E} [F_{t,w}(x_t) - F_{t,w}(x_{t+1})] + \eta^2 \frac{\beta}{2} \frac{\sigma^2}{w}.
\end{aligned}$$

Also, we note that

$$\begin{aligned}
& F_{t+1,w}(x_{t+1}) - F_{t,w}(x_{t+1}) \\
& = \frac{1}{w} \sum_{i=0}^{w-1} f_{t+1-i}(x_{t+1}) - \frac{1}{w} \sum_{i=0}^{w-1} f_{t-i}(x_{t+1}) \\
& = \frac{1}{w} \sum_{i=-1}^{w-2} f_{t-i}(x_{t+1}) - \frac{1}{w} \sum_{i=0}^{w-1} f_{t-i}(x_{t+1}) \\
& = \frac{f_{t+1}(x_{t+1}) - f_{t-w+1}(x_{t+1})}{w} \leq \frac{2M}{w}
\end{aligned}$$

Adding the last two inequalities, we proceed to sum the above inequality over all time steps:

$$\mathbb{E} \left[ \sum_{t=1}^T \|\nabla F_{t,w}(x_t)\|^2 \right] \leq \frac{2M + \frac{2MT}{w} + \frac{T\beta\eta^2\sigma^2}{2w}}{\eta - \frac{\beta\eta^2}{2}}.$$

Setting  $\eta = 1/\beta$  yields the claim from the theorem.

Finally, note that for each round the number of stochastic gradient oracle calls required is  $w$ . Therefore, across all  $T$  rounds, the number of noisy oracle calls is  $Tw$ .  $\square$

## B. Proof of Theorem 5.1 (ii)

Following the technique from Theorem 3.1, for  $2 \leq t \leq T$ , let  $\tau_t$  be the number of iterations of the inner loop during the execution of Algorithm 3 during round  $t-1$  (in order to generate the iterate  $x_t$ ). Then, we have the following lemma:

**Lemma B.1.** For any  $2 \leq t \leq T$ ,

$$F_{t-1}(x_t) - F_{t-1}(x_{t-1}) \leq -\tau_t \cdot \frac{\delta^3}{2\beta w^3}.$$

*Proof.* This follows by summing the inequality Lemma 5.3 for across all pairs of consecutive iterates of the inner loop

within the same epoch, and noting that each term  $\Phi(z)$  is at least  $\frac{\delta^3}{w^3}$  before the inner loop has terminated.  $\square$

Finally, we write (understanding  $F_0(x_0) := 0$ ):

$$\begin{aligned} F_T(x_T) &= \sum_{t=1}^T F_t(x_t) - F_{t-1}(x_{t-1}) \\ &= \sum_{t=1}^T F_{t-1}(x_t) - F_{t-1}(x_{t-1}) + f_t(x_t) - f_{t-w}(x_t) \\ &\leq \sum_{t=2}^T [F_{t-1}(x_t) - F_{t-1}(x_{t-1})] + \frac{2MT}{w}. \end{aligned}$$

Using Lemma B.1, we have

$$F_T(x_T) \leq \frac{2MT}{w} - \frac{\delta^3}{2\beta w^3} \cdot \sum_{t=1}^T \tau_t,$$

whence

$$\begin{aligned} \tau &= \sum_{t=1}^T \tau_t \leq \frac{2\beta w^3}{\delta^3} \cdot \left( \frac{2MT}{w} - F_T(x_T) \right) \\ &\leq \frac{2\beta M}{\delta^3} \cdot (2Tw^2 + w^3) \\ &\leq \frac{6M}{\beta^2} \cdot Tw^2, \end{aligned}$$

as claimed (recalling that we chose  $\delta = \beta$  for this analysis).  $\square$

## C. Proof of Theorem 6.2

Summing up the definitions of  $w$ -regret bounds achieved by each  $\mathcal{A}$ , and truncating the first  $w - 1$  terms, we get

$$\sum_{i=1}^k \sum_{t=w}^T \|\nabla_{\mathcal{K}, \eta} F_t^i(x_t^i)\|^2 \leq \sum_{i=1}^k \mathfrak{R}_{w, \mathcal{A}_i}(T).$$

Thus, for some  $t$  between  $w$  and  $T$  inclusive, it holds that

$$\begin{aligned} \sum_{i=1}^k \left\| \nabla_{\mathcal{K}, \eta} \left[ \frac{\sum_{j=0}^{w-1} \tilde{f}_{i, t-j}}{w} \right] (x_t^i) \right\|^2 &= \sum_{i=1}^k \|\nabla_{\mathcal{K}, \eta} F_t^i(x_t^i)\|^2 \\ &\leq \sum_{i=1}^k \frac{\mathfrak{R}_{w, \mathcal{A}_i}(T)}{T - w}. \end{aligned}$$

Thus, for the same  $t$  we have

$$\max_{i \in [k]} \left\| \nabla_{\mathcal{K}, \eta} \left[ \frac{\sum_{j=0}^{w-1} \tilde{f}_{i, t-j}}{w} \right] (x_t^i) \right\| \leq \sqrt{\sum_{i=1}^k \frac{\mathfrak{R}_{w, \mathcal{A}_i}(T)}{T - w}},$$

as claimed.  $\square$
